# Supplementary material for: Clinical significance of APOB inactivation in hepatocellular carcinoma
Source: PubMed Central journal article supplement (PMC6235894; doi:10.1038/s12276-018-0174-2), 2018-11-14
Supplement: 12276_2018_174_MOESM1_ESM.pdf [file 12276_2018_174_MOESM1_ESM.pdf]

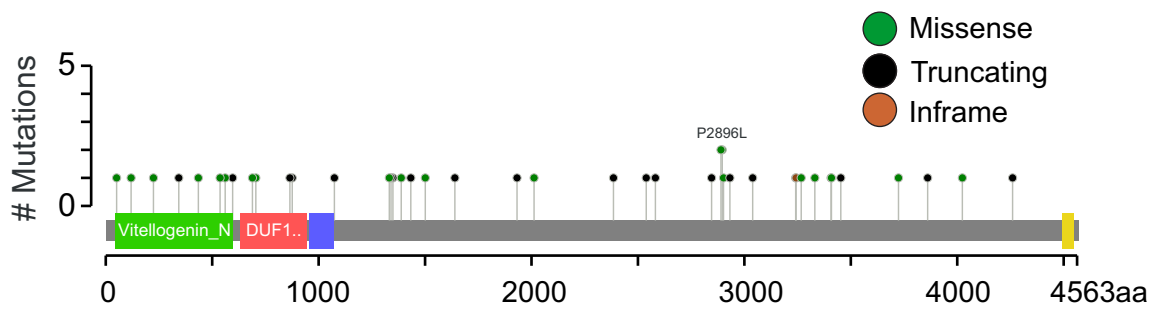

**Supplementary Figure 1.** Mutations of APOB in HCC from TCGA project.

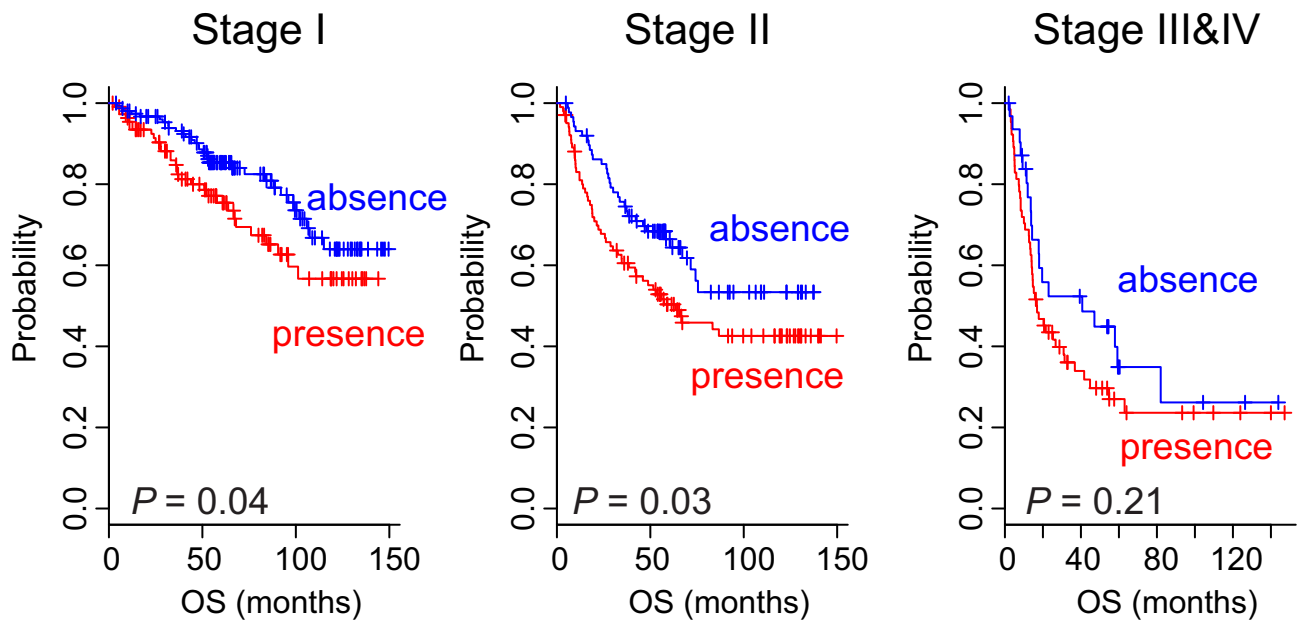

**Supplementary Figure 2.** Kaplan–Meier plots of overall survival (OS) in patients with hepatocellular carcinoma stratified by ASS. The prognostic significance of ASS was independent of stage. P values were obtained using the log-rank test.

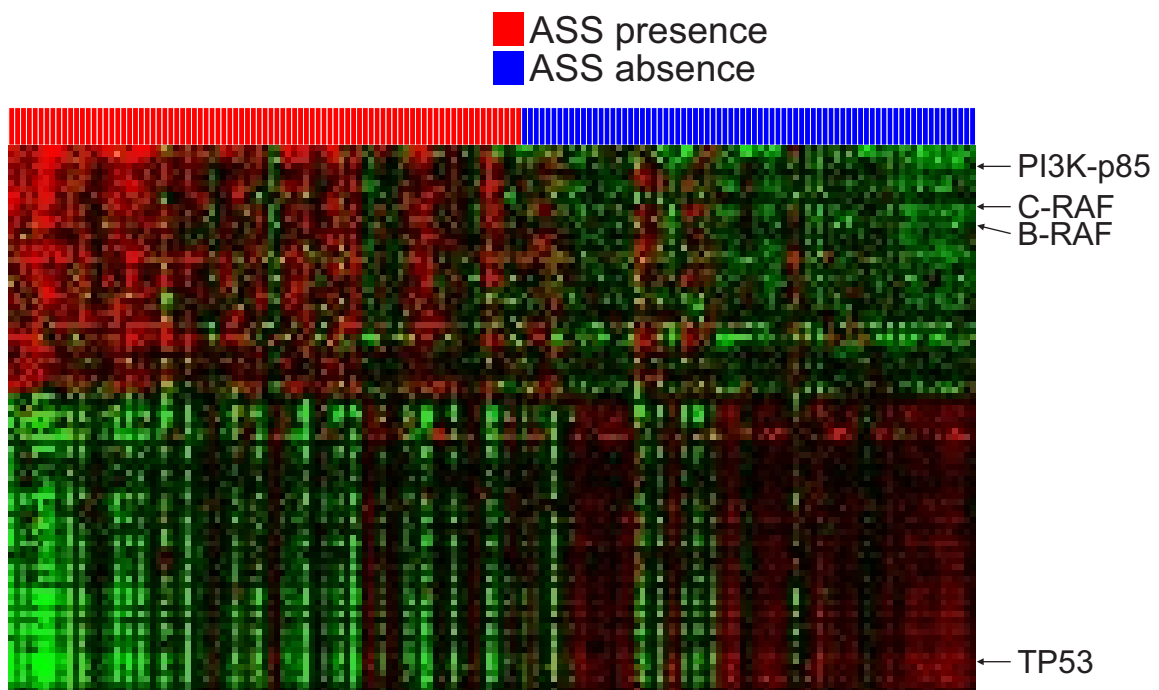

**Supplementary Figure S3. Proteomic characteristics of hepatocellular carcinoma tumors associated with ASS in TCGA cohort.**

Protein expression data were generated by reverse phase protein arrays. Proteins whose expression was associated with the Bayesian probability of an ASS ( $r > 0.3$  or  $< -0.3$ ;  $P < 0.0001$ ) were selected (93 proteins).

**Supplementary Table S1. Sequences of siRNA and shRNA used for silencing of APOB in HCC cells.**

| <b>Names</b>          | <b>Sequences</b>                                                   |
|-----------------------|--------------------------------------------------------------------|
| siRNAs                |                                                                    |
| Sigma mission control |                                                                    |
| siAPOB-1              | 5'-GCAAGUACCUGAGAACGGATT-3'                                        |
| siAPOB-2              | 5'-GAACAAUCCUCAGAGUUAATT-3'                                        |
| shRNAs                |                                                                    |
| Sigma mission control |                                                                    |
| shAPOB-1              | 5'-CCGGGAACTCAGAAGGATGGCATTCTCGA<br>GAAATGCCATCCTTCTGAGTTCTTTTT-3' |
| shAPOB-2              | 5'-CCGGCGGAACTATCAACTCTACAACTCGA<br>GTTTGTAGAGTTGATAGTTCCGTTTTT-3' |
| shAPOB-3              | 5'-CCGGCGCTACCAGAAAGACAAGAACTCGA<br>GTTTCTTGTCTTTCTGGTAGCGTTTTT-3' |

**Supplementary Table S2. Univariate and multivariable Cox proportional hazards regression analyses of overall survival in the Fudan (n = 242) and Samsung (n = 240) cohorts.**

| <b>Characteristic</b>         | <b>Univariate analysis</b>               |                 | <b>Multivariable analysis</b> |                 |
|-------------------------------|------------------------------------------|-----------------|-------------------------------|-----------------|
|                               | <b>Hazard ratio (95% CI)<sup>a</sup></b> | <b><i>P</i></b> | <b>Hazard ratio (95% CI)</b>  | <b><i>P</i></b> |
| Age, years                    | 0.992 (0.98-1.005)                       | 0.225           |                               |                 |
| AFP, >300 ng/mL or ≤300 ng/mL | 1.644 (1.243-2.173)                      | <0.001          | 1.041 (0.761-1.425)           | 0.8             |
| Tumor size, >5 cm or ≤5 cm    | 1.147 (0.831-1.585)                      | 0.405           |                               |                 |
| AJCC stage, III/IV or I/II    | 3.614 (2.66-4.909)                       | <0.001          | 2.284 (1.555-3.354)           | <0.001          |
| BCLC stage, B/C or 0/A        | 2.83 (2.134-3.753)                       | <0.001          | 1.89 (1.329-2.687)            | <0.001          |
| ASS, absence or presence      | 1.79 (1.32-2.3)                          | <0.001          | 1.459 (1.088-1.958)           | 0.012           |

<sup>a</sup>CI, confidence interval; AFP, alpha-fetoprotein; AJCC, American Joint Committee on Cancer staging system; BCLC, Barcelona Clinic Liver Cancer staging system. ASS, APOB silencing signature.

**Supplementary Table S3. Upstream regulators of genes associated with ASS in hepatocellular carcinoma.**

| <b>Upstream regulator</b> | <b>Molecule type</b>              | <b>State</b> | <b>z-score</b> |
|---------------------------|-----------------------------------|--------------|----------------|
| CSF2                      | Cytokine                          | Activated    | 6.107          |
| RABL6                     | Other                             | Activated    | 5.396          |
| HGF                       | Growth factor                     | Activated    | 5.31           |
| MITF                      | Transcription regulator           | Activated    | 5.131          |
| ERBB2                     | Kinase                            | Activated    | 5.023          |
| PTGER2                    | G protein coupled receptor        | Activated    | 4.6            |
| TBX2                      | Transcription regulator           | Activated    | 4.571          |
| MYC                       | Transcription regulator           | Activated    | 4.491          |
| FOXM1                     | Transcription regulator           | Activated    | 4.105          |
| ESR1                      | Ligand-dependent nuclear receptor | Activated    | 3.855          |
| CCND1                     | Transcription regulator           | Activated    | 3.68           |
| E2F1                      | Transcription regulator           | Activated    | 3.488          |
| IFNG                      | Cytokine                          | Activated    | 3.442          |
| IL1B                      | Cytokine                          | Activated    | 3.17           |
| EP400                     | Other                             | Activated    | 3.148          |
| AREG                      | Growth factor                     | Activated    | 3.144          |
| TNF                       | Cytokine                          | Activated    | 3.117          |
| CD40LG                    | Cytokine                          | Activated    | 2.932          |
| MAP4K4                    | Kinase                            | Activated    | 2.887          |
| SYVN1                     | Transporter                       | Activated    | 2.828          |
| NR0B2                     | Ligand-dependent nuclear receptor | Activated    | 2.778          |
| IL6                       | Cytokine                          | Activated    | 2.742          |
| FGF2                      | Growth factor                     | Activated    | 2.724          |
| ELAVL1                    | Other                             | Activated    | 2.697          |
| ATF6                      | Transcription regulator           | Activated    | 2.611          |
| IL5                       | Cytokine                          | Activated    | 2.578          |
| CCNK                      | Kinase                            | Activated    | 2.565          |
| SP3                       | Transcription regulator           | Activated    | 2.565          |
| IGF1                      | Growth factor                     | Activated    | 2.562          |
| CSF1                      | Cytokine                          | Activated    | 2.547          |
| E2F3                      | Transcription regulator           | Activated    | 2.514          |
| CD38                      | Enzyme                            | Activated    | 2.448          |
| S100A8                    | Other                             | Activated    | 2.433          |
| EDN1                      | Cytokine                          | Activated    | 2.413          |
| IL2                       | Cytokine                          | Activated    | 2.386          |
| CNR1                      | G protein coupled receptor        | Activated    | 2.335          |
| CD24                      | Other                             | Activated    | 2.333          |
| REL                       | Transcription regulator           | Activated    | 2.331          |
| EIF4E                     | Translation regulator             | Activated    | 2.331          |
| EGF                       | Growth factor                     | Activated    | 2.324          |
| TAL1                      | Transcription regulator           | Activated    | 2.324          |
| SMOC2                     | Other                             | Activated    | 2.236          |

|        |                                   |           |        |
|--------|-----------------------------------|-----------|--------|
| POU2F2 | Transcription regulator           | Activated | 2.236  |
| PCK1   | Kinase                            | Activated | 2.2    |
| NTRK2  | Kinase                            | Activated | 2.2    |
| S100A9 | Other                             | Activated | 2.2    |
| EPO    | Cytokine                          | Activated | 2.186  |
| FLT3LG | Cytokine                          | Activated | 2.183  |
| MKMK1  | Kinase                            | Activated | 2.121  |
| NRG1   | Growth factor                     | Activated | 2.017  |
| OGT    | Enzyme                            | Activated | 2      |
| FLT1   | Kinase                            | Activated | 2      |
| OSCAR  | Other                             | Activated | 2      |
| ACTL6A | Other                             | Activated | 2      |
| YAP1   | Transcription regulator           | Activated | 2      |
| F3     | Transmembrane receptor            | Activated | 2      |
| EFNA5  | Kinase                            | Inhibited | -2     |
| EFNA4  | Kinase                            | Inhibited | -2     |
| EFNA3  | Kinase                            | Inhibited | -2     |
| TFRC   | Transporter                       | Inhibited | -2     |
| SIRT1  | Transcription regulator           | Inhibited | -2.008 |
| CEBPA  | Transcription regulator           | Inhibited | -2.099 |
| BNIP3L | Other                             | Inhibited | -2.137 |
| AHR    | Ligand-dependent nuclear receptor | Inhibited | -2.149 |
| PTEN   | Phosphatase                       | Inhibited | -2.156 |
| CLDN7  | Other                             | Inhibited | -2.219 |
| EFNA2  | Kinase                            | Inhibited | -2.236 |
| EFNA1  | Other                             | Inhibited | -2.236 |
| SRSF2  | Transcription regulator           | Inhibited | -2.236 |
| MEF2D  | Transcription regulator           | Inhibited | -2.236 |
| ATP7B  | Transporter                       | Inhibited | -2.236 |
| RBL1   | Transcription regulator           | Inhibited | -2.345 |
| NR1I3  | Ligand-dependent nuclear receptor | Inhibited | -2.364 |
| MXI1   | Transcription regulator           | Inhibited | -2.414 |
| FASN   | Enzyme                            | Inhibited | -2.433 |
| DYRK1A | Kinase                            | Inhibited | -2.438 |
| KLF15  | Transcription regulator           | Inhibited | -2.443 |
| CTLA4  | Transmembrane receptor            | Inhibited | -2.449 |
| MGEA5  | Enzyme                            | Inhibited | -2.524 |
| PPARD  | Ligand-dependent nuclear receptor | Inhibited | -2.537 |
| RXRA   | Ligand-dependent nuclear receptor | Inhibited | -2.619 |
| IRF4   | Transcription regulator           | Inhibited | -2.646 |
| NLRP3  | Other                             | Inhibited | -2.704 |
| STAT5A | Transcription regulator           | Inhibited | -2.742 |
| GATA1  | Transcription regulator           | Inhibited | -2.853 |
| CFTR   | Ion channel                       | Inhibited | -2.867 |
| FOXO3  | Transcription regulator           | Inhibited | -2.905 |
| CDKN1A | Kinase                            | Inhibited | -2.917 |

|          |                                   |           |        |
|----------|-----------------------------------|-----------|--------|
| ZFP36    | Transcription regulator           | Inhibited | -2.985 |
| SPARC    | Other                             | Inhibited | -3.051 |
| TP53     | Transcription regulator           | Inhibited | -3.142 |
| RB1      | Transcription regulator           | Inhibited | -3.262 |
| PKD1     | Ion channel                       | Inhibited | -3.302 |
| PPARG    | Ligand-dependent nuclear receptor | Inhibited | -3.402 |
| RBL2     | Other                             | Inhibited | -3.637 |
| KDM5B    | Transcription regulator           | Inhibited | -3.651 |
| SMARCB1  | Transcription regulator           | Inhibited | -3.679 |
| HNF1A    | Transcription regulator           | Inhibited | -3.69  |
| PPARGC1A | Transcription regulator           | Inhibited | -3.702 |
| NUPR1    | Transcription regulator           | Inhibited | -3.81  |
| IL10RA   | Transmembrane receptor            | Inhibited | -3.841 |
| CDKN2A   | Transcription regulator           | Inhibited | -4.077 |
| HNF4A    | Transcription regulator           | Inhibited | -4.462 |

---
